# Supplementary material for: Multiscale regulation of S, N, O tri-doped carbon/Co 8 FeS 8 catalysts with SO 4 2− -riched and lattice distortion for efficient water splitting
Source: Royal Society of Chemistry journal article supplement (doi:10.1039/d4ta03533j), 2024-01-01
Supplement: d4ta03533j1.pdf [file d4ta03533j1.pdf]

**Multiscale regulation of S, N, O tri-doped carbon/Co<sub>8</sub>FeS<sub>8</sub> catalysts with SO<sub>4</sub><sup>2-</sup>-riched and lattice distortion for efficient water splitting**

Yuanrong Ye<sup>a</sup>, Xin Zhao<sup>a\*</sup>, Guijuan Wei<sup>a\*</sup>, Shaonan Gu<sup>a</sup>, Changwei Li<sup>a</sup>, Huixin Zhang<sup>a</sup>, Junliu Zhang<sup>a</sup>, Xiaoyang Li<sup>a</sup>, Honglei Chen<sup>a\*</sup>

<sup>a</sup>State Key Laboratory of Biobased Material and Green Papermaking, Qilu University of Technology, Shandong Academy of Sciences, Jinan 250353, P.R. China

\*Corresponding author: Xin Zhao, Guijuan Wei, Honglei Chen. Tel/Fax: +86-0531-89631168.

E-mail: zhaoxin\_zixi@126.com (Xin Zhao), weiguijuan@qlu.edu.cn (Guijuan Wei), chenhonglei\_1982@163.com (Honglei Chen)

## Characterization

A scanning electron microscope (SEM, Regulus 8220, Japan) was used to examine the surface morphologies and elemental composition of materials. An FEI Tecnai G2 F20 transmission electron microscopy (TEM) apparatus with a 200-kV voltage was used to characterize the morphology. The crystal structure of the samples was studied by X-ray diffractometer (Germany, Cu K radiation). The valence and chemical states of the surface elements of the samples were determined by X-ray photoelectron spectroscopy (XPS, Escalab 250 Xi, USA). Raman spectra of the samples were acquired using a LabRAM Hr800 confocal Raman microscopic system and a 532 nm excitation laser. The uncoordinated electrons of the samples were tested using an electron paramagnetic resonance (EPR) spectrometer (Bruker EMXplus).

## Electrochemical Tests and Calculations

Thorough assessment of the materials' electrocatalytic performance for OER and HER was carried out using a typical three-electrode arrangement with the electrochemical workstation CHI 660E. Ag/AgCl (saturated KCl solution) and carbon rod were used as reference and counter electrodes. The working electrodes were prepared as follows: the samples were ground into a powder using a mortar. Afterward, the sample was dispersed in 460  $\mu\text{L}$  of water/ethanol mixed solvents (300  $\mu\text{L}$  of ethanol, 160  $\mu\text{L}$  water) along with 40  $\mu\text{L}$  of Nafion solution (5 wt%), and the mixture was sonicated for about 30 min to generate a homogeneous catalyst ink. Then, 50  $\mu\text{L}$  of the above solution was drop-cast onto the NF and dried at room temperature, leading to a catalyst loading of 2.5  $\text{mg cm}^{-2}$ . The electrolyte solution was 1 M KOH solution. The geometric area of NF is used to standardize the current density. The recorded potential is converted to a reversible hydrogen electrode scale :

$$E(\text{RHE}) = E(\text{Ag/AgCl}) + 0.197 + 0.059 \times \text{pH},$$

Linear sweep voltammetry (LSV) polarization curves were obtained using ohmic potential drop ( $iR$ ) correction in 1 mol KOH solution at a scan rate of 10  $\text{mV s}^{-1}$ . The cyclic voltammetry curves were examined at seven different scan rates (10, 20, 40, 60, 80, 100 and 120  $\text{mV s}^{-1}$ ) within a voltage range of 0-0.1 V, and the corresponding current density values were obtained. The double-layer capacitance ( $C_{dl}$ ) and of the samples were obtained at different scan rates using  $\Delta j (j_a - j_c)/2$ . The electrochemically active surface area (ECSA) was determined by normalizing the double-layer capacitance ( $C_{dl}$ ) to the specific capacitance of 0.04  $\text{mF cm}^{-2}$ . Specific activity was calculated using the following equations:

$$\text{Specific activity} = \frac{j * A}{\text{ECSA}}$$

where  $j$  is the current density;  $A$  is the surface area, and ECSA is the electrochemical surface area.

Using chronoamperometry ( $i-t$ ) at a fixed voltage to evaluate the durability of the sample. The overall water splitting performance of the samples was tested in a two-electrode mode.

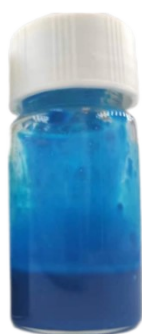

**Fig. S1** Precursor of SNO-C/Co<sub>8</sub>FeS<sub>8</sub>

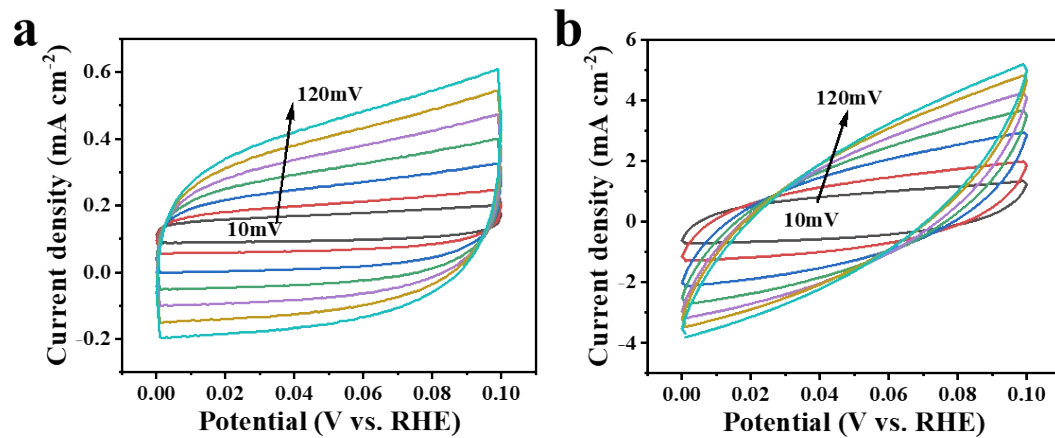

**Fig. S2** CV curves of SN-Co<sub>8</sub>FeS<sub>8</sub> and SNO-C/Co<sub>8</sub>FeS<sub>8</sub> at different scanning rates.

**Table S1.** Comparison of OER performance in 1 M KOH solution for SNO-C/Co<sub>8</sub>FeS<sub>8</sub> with other metal electrocatalysts.

| Catalyst                                                                     | Overpotential @j mA<br>cm <sup>-2</sup> (mV @ j) | Reference                                              |
|------------------------------------------------------------------------------|--------------------------------------------------|--------------------------------------------------------|
| SNO-C/Co <sub>8</sub> FeS <sub>8</sub>                                       | 230@10<br>268@100<br>290@400                     | This work                                              |
| CFS-ACs/CNT                                                                  | 270@20                                           | Nature Communications<br>(2024) 15:1720                |
| Fe-Ni-Co-MOF                                                                 | 236@10                                           | ACS Catal. 2024, 14,<br>1553-1566                      |
| (NiFeCoMn) <sub>3</sub> S <sub>4</sub>                                       | 289@10                                           | Adv. Funt. Mater. 2023, 33,<br>2208170.                |
| (CrMnFeCoNi) <sub>x</sub> S <sub>x</sub>                                     | 295@100                                          | Adv. Energy Mater. 2021,<br>11, 2002887.               |
| Ni-Fe-S/NCQDs                                                                | 295@10                                           | Appl. Catal. B-Environ.<br>2023, 324, 122230.          |
| CoS <sub>2</sub> /MoS <sub>2</sub>                                           | 255@10                                           | Chem. Eng. J. 2023, 470,<br>144372.                    |
| NiFe alloy                                                                   | 298@10                                           | Catalysis Today, 2020, 352:<br>27-33                   |
| Fe <sub>2</sub> O <sub>3</sub> /Fe <sub>0.64</sub> Ni <sub>0.36</sub> @C-800 | 274@10                                           | Small 2023, 2208276                                    |
| Fe-NiS <sub>2</sub> /NCNT                                                    | 292@10                                           | J. Colloid Interf. Sci. 581<br>(2021)<br><br>608 - 618 |

**Table S2.** Comparison of HER performance in 1 M KOH solution for SNO-C/Co<sub>8</sub>FeS<sub>8</sub> with other metal electrocatalysts.

| Catalyst                                       | Overpotential @j mA<br>cm <sup>-2</sup> (mV @ j) | Reference                                                         |
|------------------------------------------------|--------------------------------------------------|-------------------------------------------------------------------|
| SNO-C/Co <sub>8</sub> FeS <sub>8</sub>         | 120@10<br>235@100<br>365@400                     | This work                                                         |
| Co@NPC-800                                     | 274@10                                           | Chemical Engineering<br>Journal 430 (2022) 132783                 |
| Mo-Ni <sub>3</sub> S <sub>4</sub> /CW-0.4      | 240@10<br>337@100                                | Applied Catalysis B:<br>Environmental 339 (2023)<br>123123        |
| Co <sub>8</sub> FeS <sub>8</sub> @CoFe- MOF/NF | 361@10<br>473@100                                | Journal of Colloid and<br>Interface Science 634 (2023)<br>630–641 |
| Co <sub>9</sub> S <sub>8</sub>                 | 295@100                                          | Small 2022, 18, 2204309                                           |
| Co <sub>0.25</sub> Fe <sub>0.75</sub> -LDH     | 365@10                                           | ACS Catal. 2023, 13,<br>1477–1491                                 |
| Co@NCNT/CW                                     | 209@100                                          | Adv. Energy Mater. 2023,<br>2300427                               |
| Co-ALMO@NF                                     | 302@100<br>349@500                               | Adv. Sci. 2023, 10, 2206952                                       |
| Ni <sub>2</sub> P/FeP-FF                       | 207@100                                          | Adv. Funct. Mater. 2023, 33,<br>2302621                           |
| Co <sub>2</sub> N <sub>0.67</sub> -BHPC        | 210@10                                           | Journal of Energy Chemistry<br>54 (2021) 626–638                  |

**Table S3.** Electrochemical results of the catalysts.

| Samples            | $C_{dl}$ (mF $cm^{-2}$ ) | ECSA ( $cm^2$ ) | Specific activity ( $mA\ cm^{-2}$ ) @ 1.52 V | J ( $mA\ cm^{-2}$ ) @ 1.52 V |
|--------------------|--------------------------|-----------------|----------------------------------------------|------------------------------|
| SNO-C/ $Co_8FeS_8$ | 23.09                    | 577.25          | 0.6929                                       | 400                          |
| SN- $Co_8FeS_8$    | 0.47                     | 11.75           | 0.6136                                       | 7.21                         |

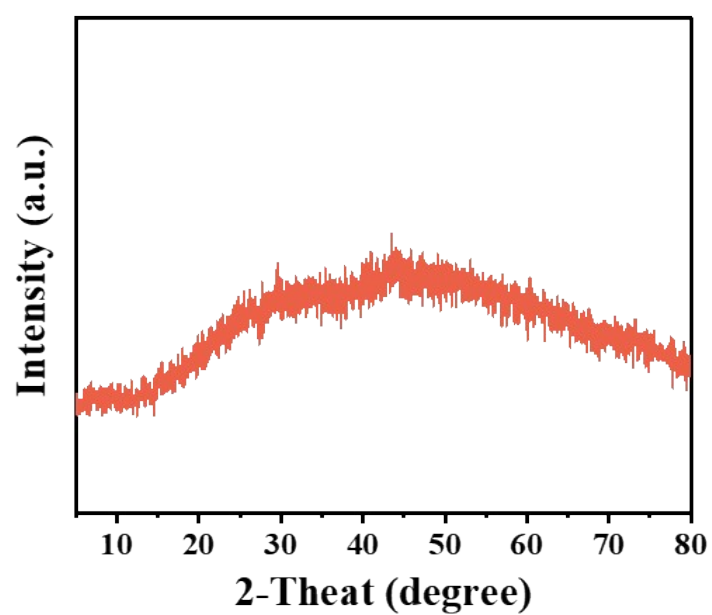

Fig. S3 XRD pattern after 50 h i-t test at OER process.

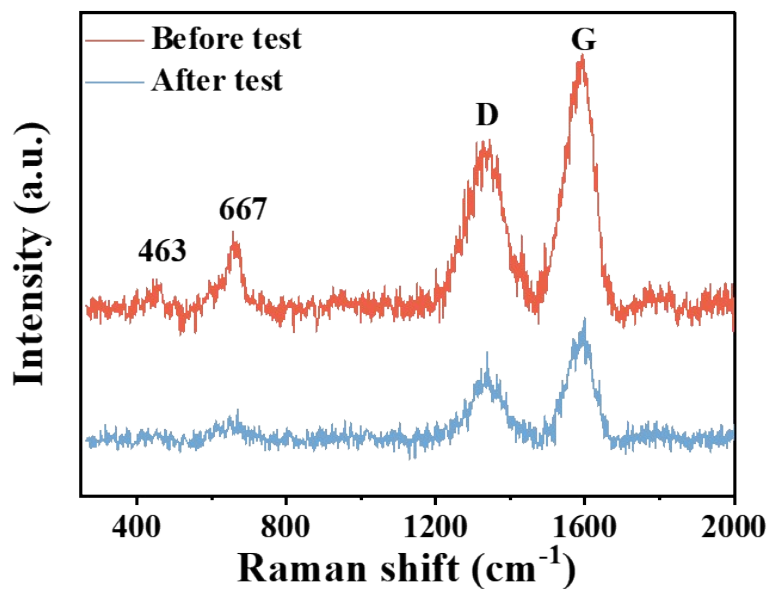

Fig. S4 Raman spectra after 50 h i-t test at OER process.

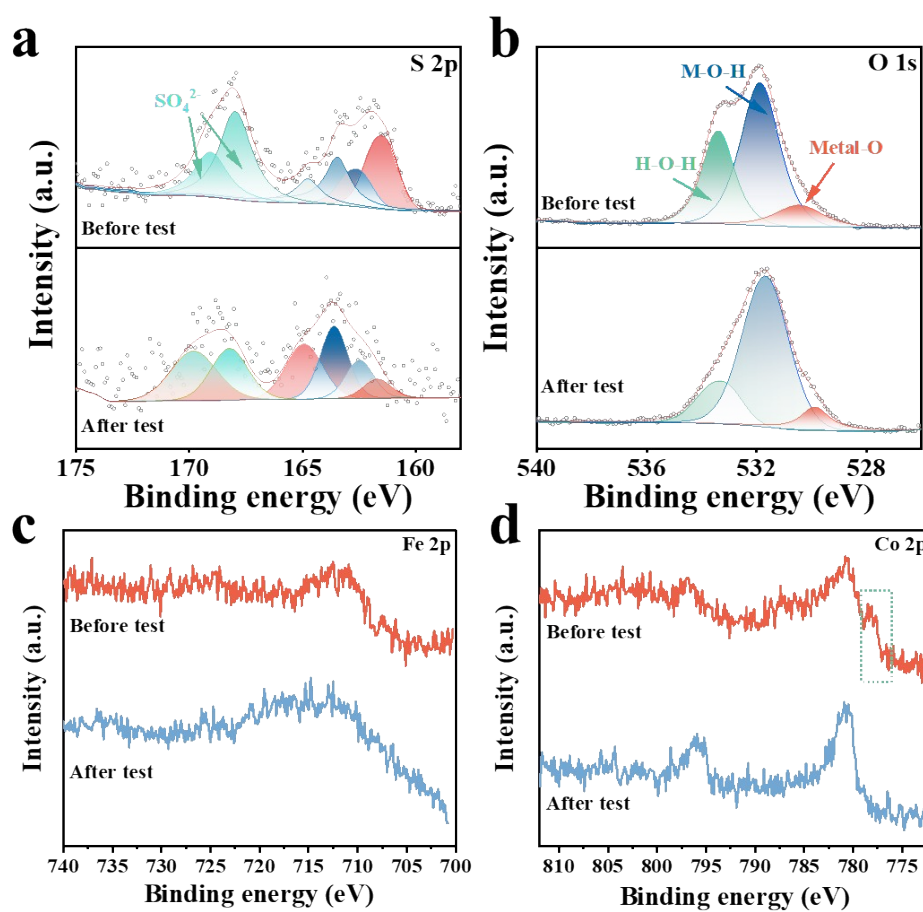

**Fig. S5** High resolution XPS survey spectra of (a) S 2p, (b) O 1s, (c) Fe 2p and (d) Co 2p spectra after 50 h i-t test at OER process.

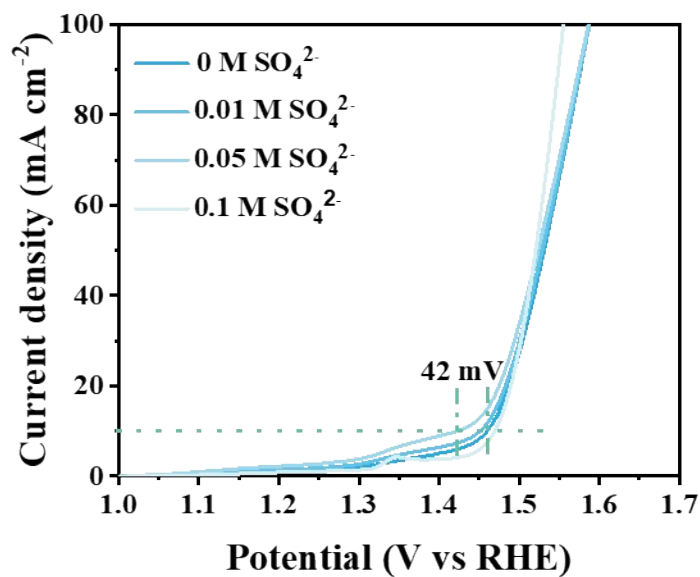

**Fig. S6** LSV curves of SNO-C/Co<sub>3</sub>FeS<sub>8</sub> tested in 1 M KOH electrolyte supplemented with different concentrations of SO<sub>4</sub><sup>2-</sup>.



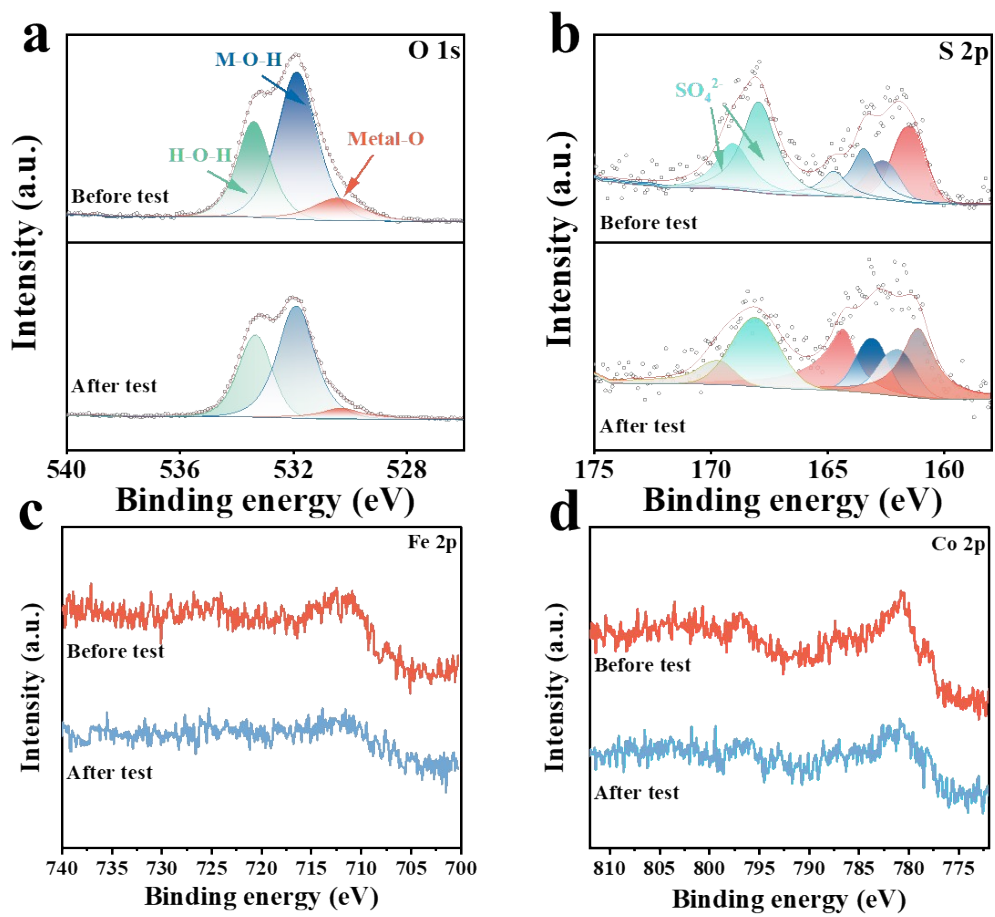

**Fig. S7** High resolution XPS survey spectra of (a) S 2p, (b) O 1s, (e) Fe 2p and (f) Co 2p spectra after 50 h i-t test at HER process.

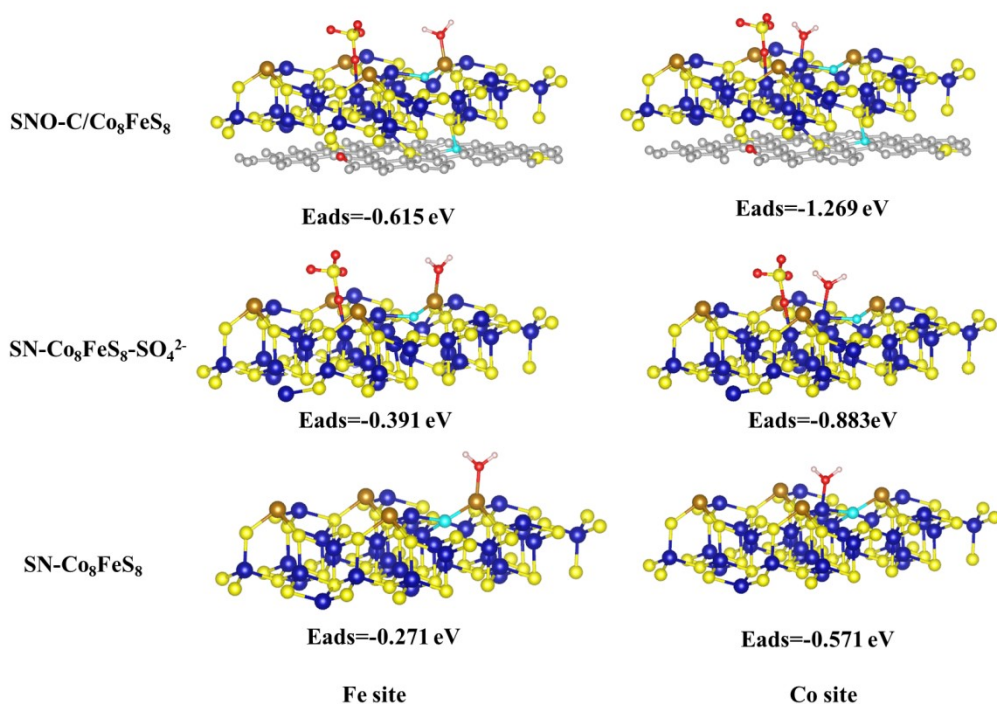

**Fig. S8** The adsorption models of SNO-C/Co<sub>8</sub>FeS<sub>8</sub>, SN-Co<sub>8</sub>FeS<sub>8</sub>-SO<sub>4</sub><sup>2-</sup> and SN-Co<sub>8</sub>FeS<sub>8</sub> on Fe and Co sites for H<sub>2</sub>O.

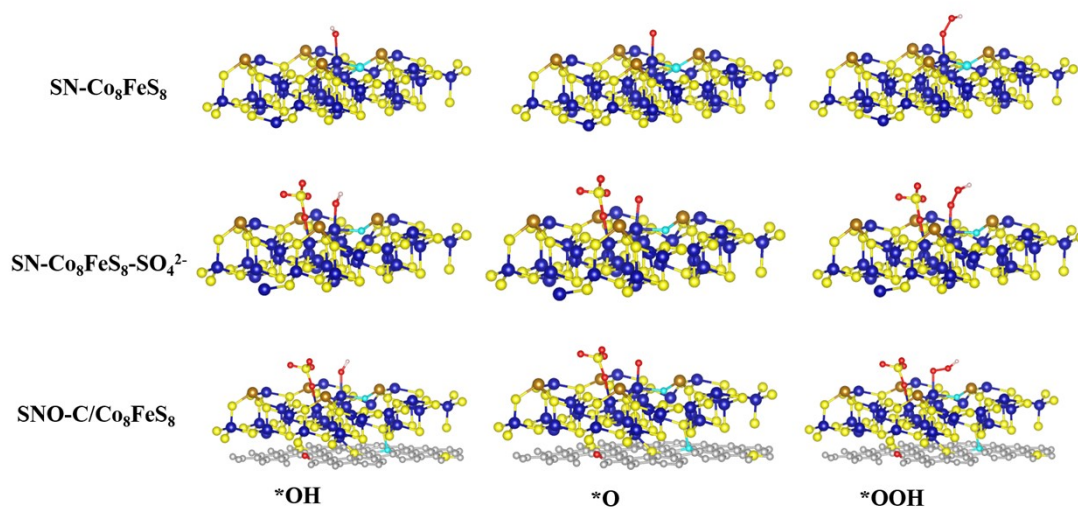

**Fig. S9** Adsorbed structures of \*O, \*OH and \*OOH of OER.

## Theoretical calculation Methods

We have employed the first-principles <sup>[1,2]</sup> to perform density functional theory (DFT) calculations within the generalized gradient approximation (GGA) using the Perdew-Burke-Ernzerhof (PBE) <sup>[3]</sup> formulation. We have chosen the projected augmented wave (PAW) potentials <sup>[4,5]</sup> to describe the ionic cores and take valence electrons into account using a plane wave basis set with a kinetic energy cutoff of 500 eV. The GGA+U method was adopted in our calculations. The value of the effective Hubbard U was set as 4.931 eV for Co Partial occupancies of the Kohn–Sham orbitals were allowed using the Gaussian smearing method and a width of 0.1 eV. The electronic energy was considered self-consistent when the energy change was smaller than  $10^{-5}$  eV. A geometry optimization was considered convergent when the energy change was smaller than  $0.05 \text{ eV } \text{Å}^{-1}$ . The Brillouin zone integration is performed using  $2 \times 2 \times 1$  Monkhorst-Pack k-point sampling for a structure. Finally, the adsorption energies (Eads) were calculated as  $E_{\text{ads}} = E_{\text{ad/sub}} - E_{\text{ad}} - E_{\text{sub}}$ , where  $E_{\text{ad/sub}}$ ,  $E_{\text{ad}}$ , and  $E_{\text{sub}}$  are the total energies of the optimized adsorbate/substrate system, the adsorbate in the structure, and the clean substrate, respectively. The free energy was calculated using the equation:

$$G = E_{\text{ads}} + \text{ZPE} - \text{TS}$$

where G,  $E_{\text{ads}}$ , ZPE and TS are the free energy, total energy from DFT calculations, zero point energy and entropic contributions, respectively, where T is set to 300K.

The d-band center Spin up/down was calculated by the following formula:

$$d_{\text{up/down}} = \frac{\int_{-\infty}^{\infty} \varepsilon_d(\varepsilon) \varepsilon dx}{\int_{-\infty}^{\infty} \varepsilon_d(\varepsilon) dx}$$

where  $\varepsilon$  is the energy level and  $\varepsilon_d(\varepsilon)$  is DOS.

$$\text{The finally d-band center} = \frac{d_{\text{up}} + d_{\text{down}}}{2} .$$

## References

1. Kresse, G.; Furthmüller, J. Efficiency of Ab-Initio Total Energy Calculations for Metals and Semiconductors Using a Plane-Wave Basis Set. *Comput. Mater. Sci.* 1996, 6, 15–50.
2. Kresse, G.; Furthmüller, J. Efficient Iterative Schemes for Ab Initio Total-Energy Calculations Using a Plane-Wave Basis Set. *Phys. Rev. B* 1996, 54, 11169–11186.
3. Perdew, J. P.; Burke, K.; Ernzerhof, M. Generalized Gradient Approximation Made Simple. *Phys. Rev. Lett.* 1996, 77, 3865–3868.
4. Kresse, G.; Joubert, D. From Ultrasoft Pseudopotentials to the Projector Augmented-Wave Method. *Phys. Rev. B* 1999, 59, 1758-1775.
5. Blöchl, P. E. Projector Augmented-Wave Method. *Phys. Rev. B* 1994, 50,

17953–17979.

6. V. Wang, N. Xu, J.C. Liu, G. Tang, W.T. Geng, VASPKIT: A User-Friendly Interface Facilitating High-Throughput Computing and Analysis Using VASP Code, *Computer Physics Communications* 267, 108033 (2021)
